# Supplementary material for: Isomer-specific photofragmentation of C3H3+ at the carbon K-edge
Source: Royal Society of Chemistry journal article supplement (doi:10.1039/d4cp00370e), 2024-01-01
Supplement: d4cp00370e1.pdf [file d4cp00370e1.pdf]

Supplementary Information  
Isomer-specific photofragmentation of  $C_3H_3^+$  at  
the carbon K-edge

Simon Reinwardt,<sup>a</sup> Patrick Cieslik,<sup>a</sup> Ticia Buhr,<sup>b</sup>  
Alexander Perry-Sassmannshausen,<sup>b</sup> Stefan Schippers,<sup>b</sup> Alfred Müller,<sup>b</sup>  
Florian Trinter,<sup>c</sup> and Michael Martins<sup>\*a</sup>

April 2024

<sup>a</sup> *Institut für Experimentalphysik, Universität Hamburg,  
Luruper Chaussee 149, 22761 Hamburg, Germany*

<sup>b</sup> *I. Physikalisches Institut, Justus-Liebig-Universität Gießen,  
Leihgesterner Weg 217, 35292 Gießen, Germany*

<sup>c</sup> *Molecular Physics, Fritz-Haber-Institut der Max-Planck-Gesellschaft,  
Faradayweg 4-6, 14195 Berlin, Germany*

†Corresponding author: michael.martins@uni-hamburg.de

# 1 Geometry-optimized ground states

## 1.1 $c\text{-C}_3\text{H}_3^+$ symmetry: $D_{3h}$

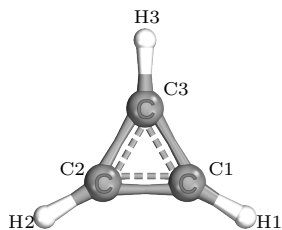

| Bond  | Length [Å] | Start-Vertex-End | Angle [°] |
|-------|------------|------------------|-----------|
| C1-C2 | 1.345      | C1-C2-C3         | 60.0      |
| C2-C3 | 1.345      | C2-C1-C3         | 60.0      |
| C1-C3 | 1.345      | C1-C3-C2         | 60.0      |
| C1-H1 | 1.070      | C2-C1-H1         | 150.0     |
| C2-H2 | 1.070      | C3-C1-H1         | 150.0     |
| C3-H3 | 1.070      | C1-C2-H2         | 150.0     |
|       |            | C3-C2-H2         | 150.0     |
|       |            | C1-C3-H3         | 150.0     |
|       |            | C2-C3-H3         | 150.0     |

## 1.2 $[\text{H}_2\text{C}-\text{C}-\text{CH}]^+$ symmetry: $C_{2v}$

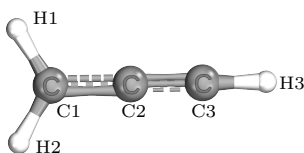

| Bond  | Length [Å] | Start-Vertex-End | Angle [°] |
|-------|------------|------------------|-----------|
| C1-C2 | 1.339      | C1-C2-C3         | 180.0     |
| C2-C3 | 1.206      | C2-C3-H3         | 180.0     |
| C1-H1 | 1.078      | C2-C1-H1         | 120.4     |
| C1-H2 | 1.078      | C2-C1-H2         | 120.4     |
| C3-H3 | 1.065      | H1-C1-H2         | 119.1     |

## 1.3 $[\text{H}_3\text{C}-\text{C}-\text{C}]^+$ symmetry: $C_{3v}$

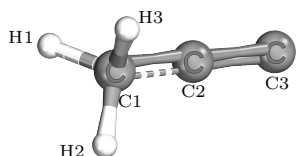

| Bond  | Length [Å] | Start-Vertex-End | Angle [°] |
|-------|------------|------------------|-----------|
| C1-C2 | 1.436      | C1-C2-C3         | 180.0     |
| C2-C3 | 1.332      | C2-C1-H1         | 108.8     |
| C1-H1 | 1.088      | C2-C1-H2         | 108.8     |
| C1-H2 | 1.088      | C2-C1-H3         | 108.8     |
| C1-H3 | 1.088      | H1-C1-H2         | 110.2     |
|       |            | H1-C1-H3         | 110.2     |
|       |            | H2-C1-H3         | 110.2     |

# 2 Calculated spectra using the BLYP and PBE functionals

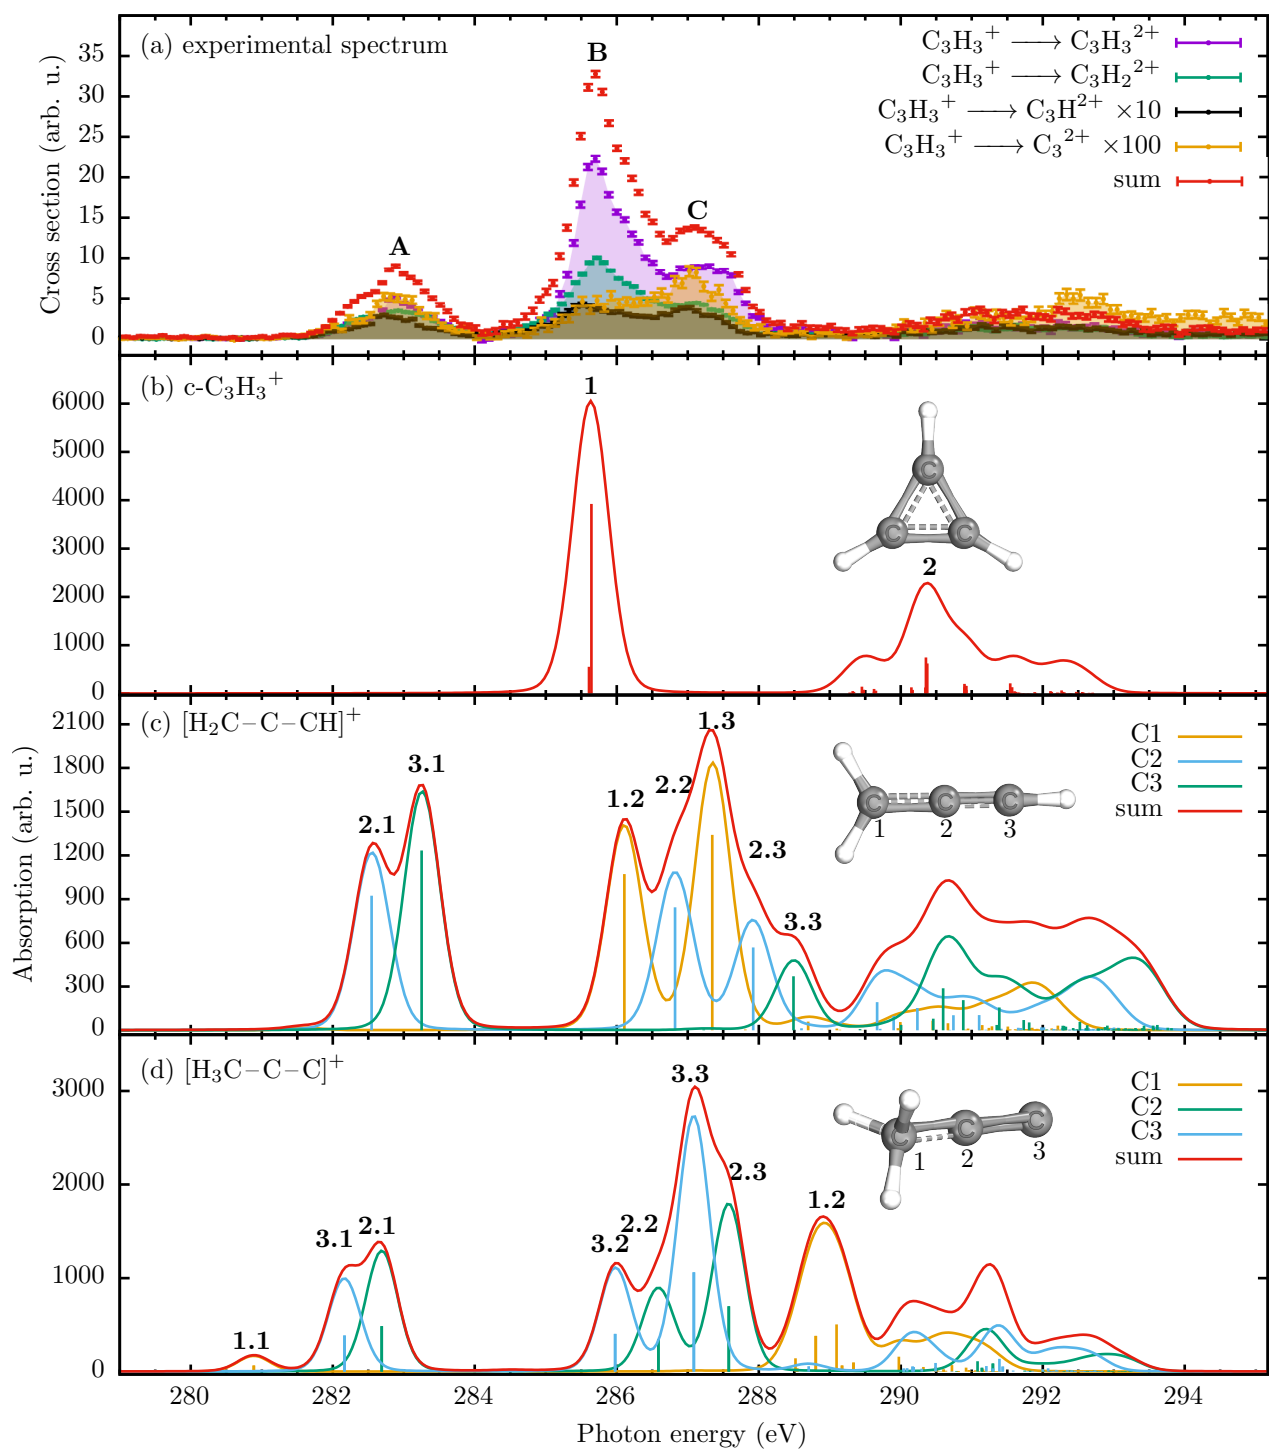

Figure 1: The effect of a particular functional on the calculated spectra is illustrated by a new calculation with BLYP. The differences in the spectra caused by the various functionals are only small.

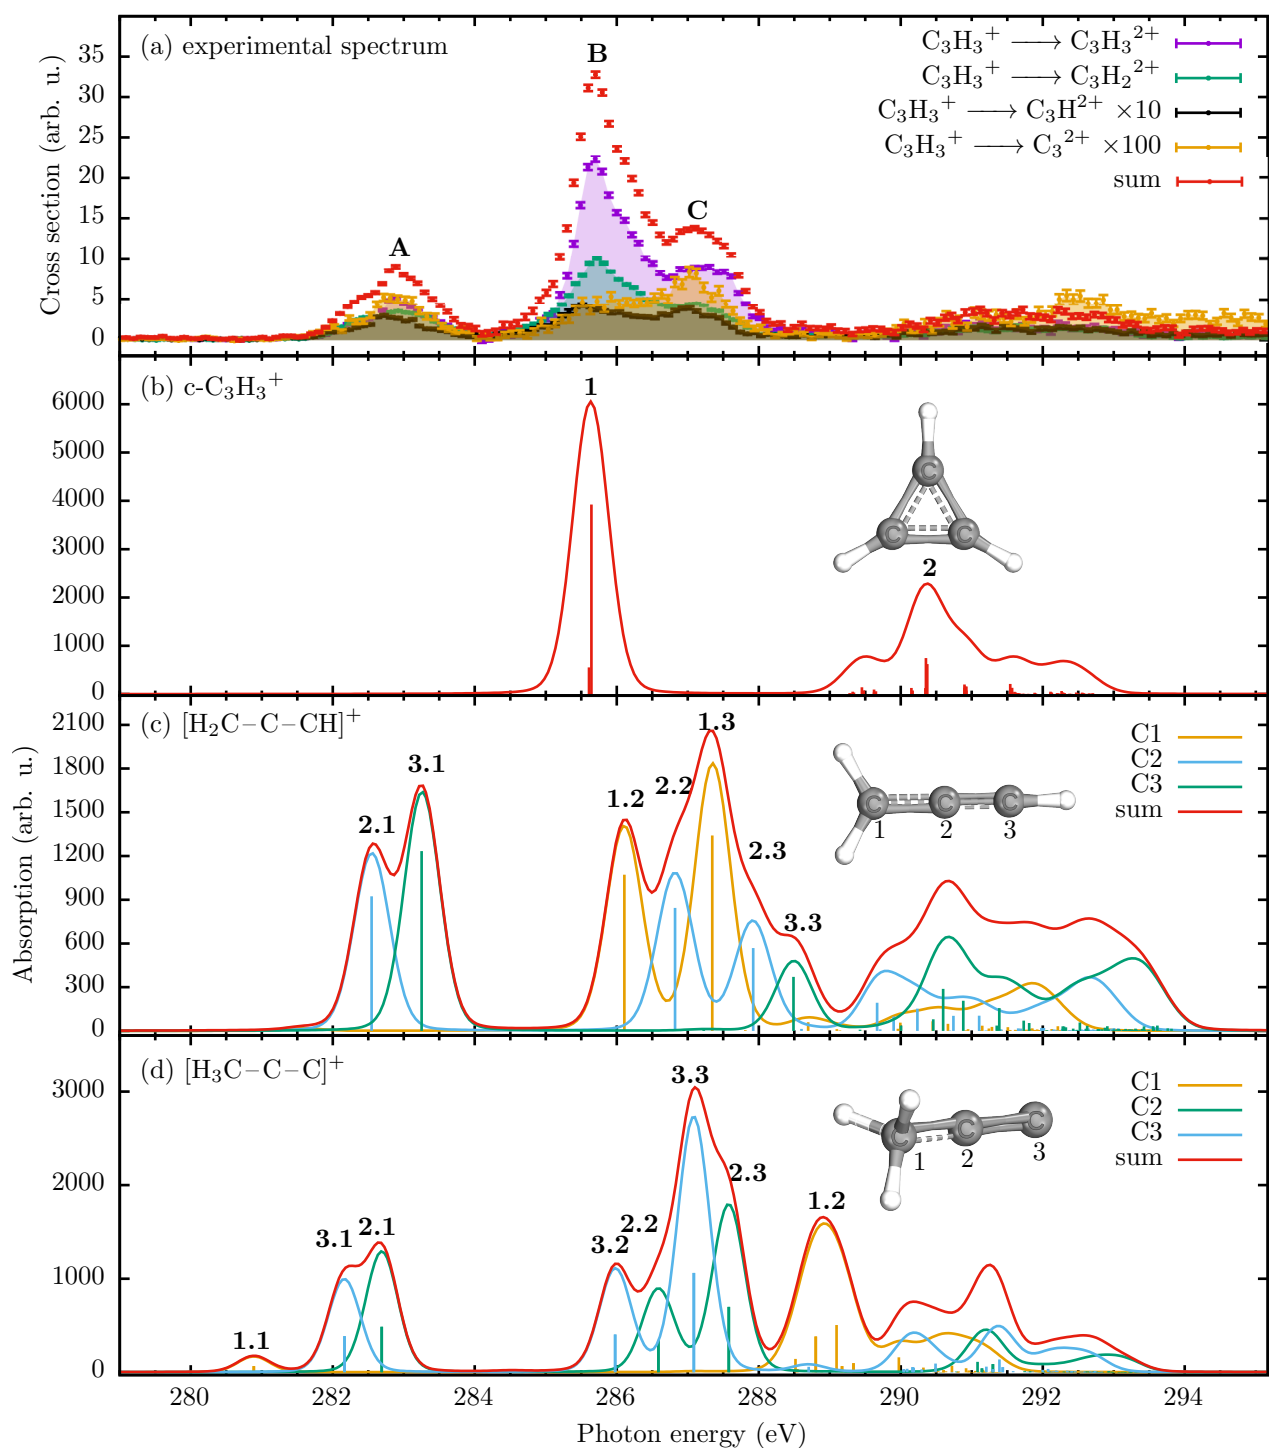

Figure 2: The calculated spectra using the PBE functional. As already mentioned in the caption of the Fig. 1, the differences are only small.
